# Supplementary material
Source: Research Square preprint supplement (doi:10.21203/rs.3.rs-9480848/v1)
Supplement: Supplementary file 1 [file 6dde726fec451c07bfc611e7.docx]

**INPUT OUTPUT**


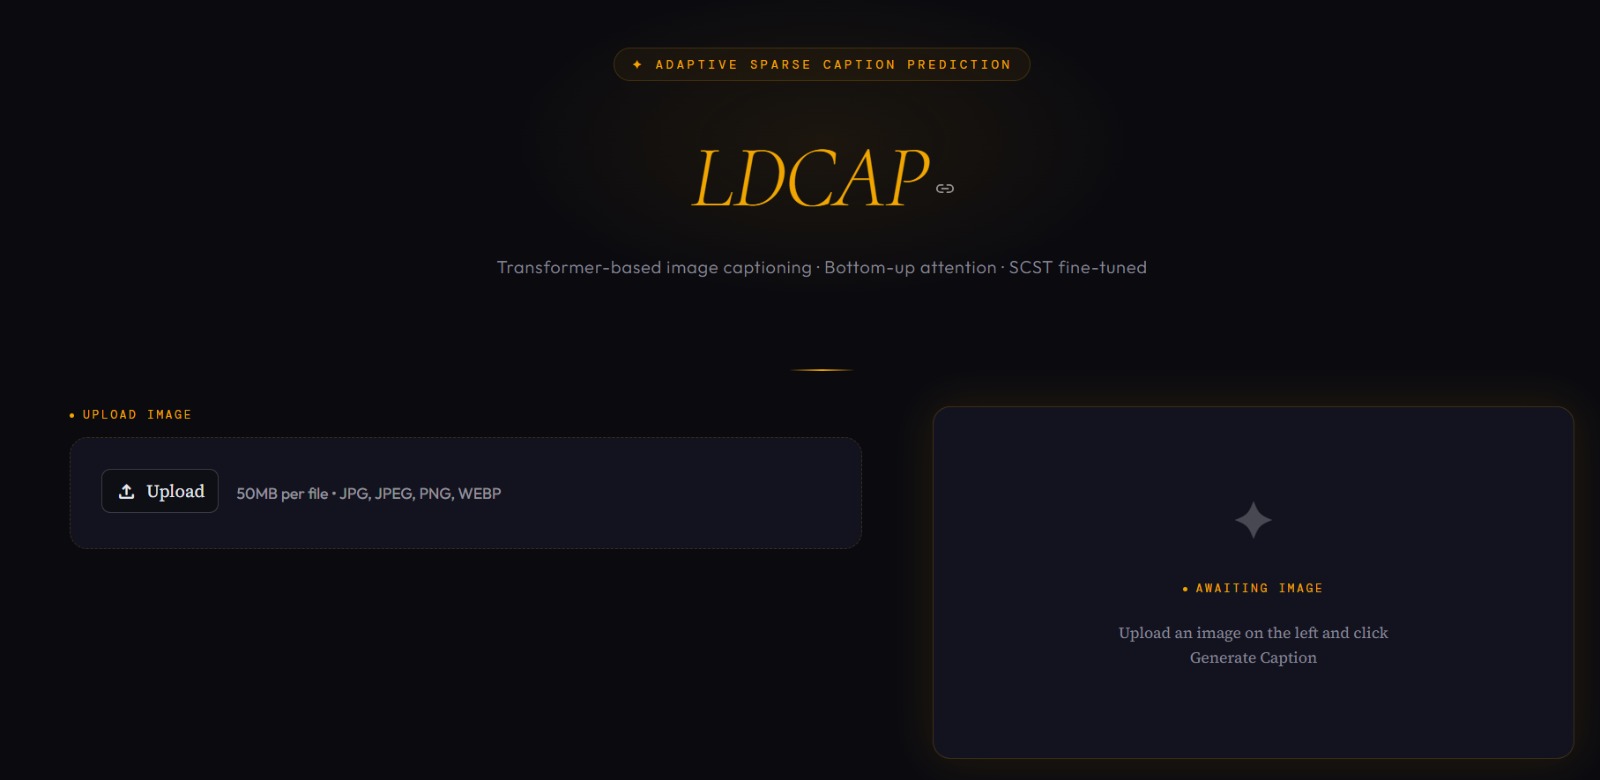


Figure 1: LDCAP interface illustrating image upload and caption generation through latent compression (RIN encoder) and dynamically conditioned decoding (FiLM), enabling robust performance under d

*Figure 2: LDCAP interface showing the image upload stage, where a user selects an input image from the local system to initiate feature extraction and caption generation within the proposed pipeline.*
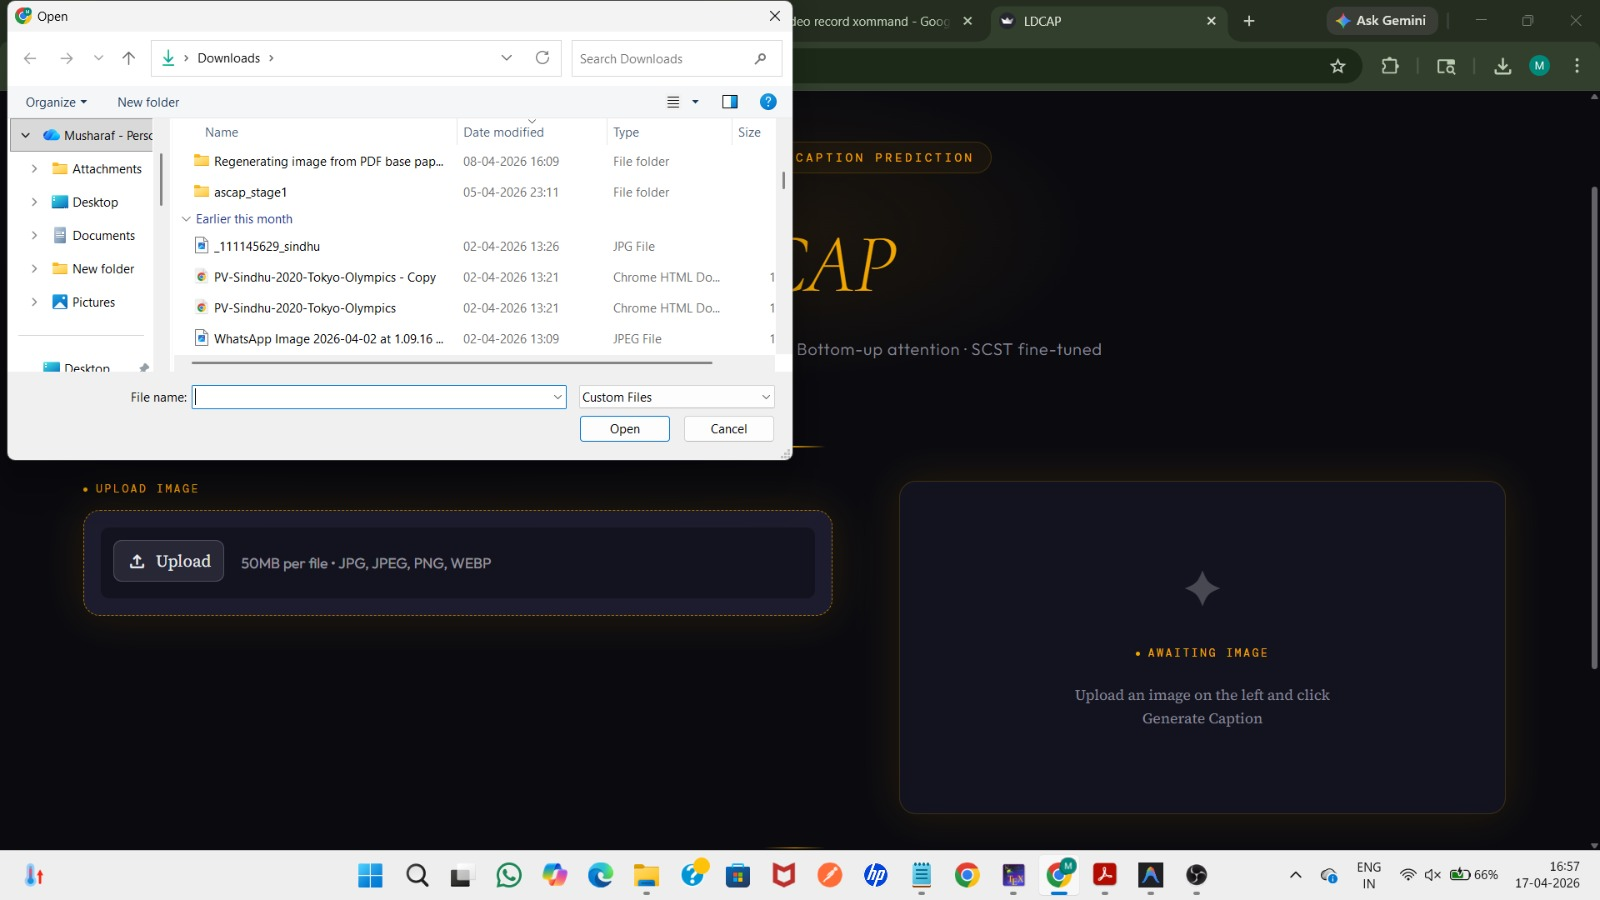


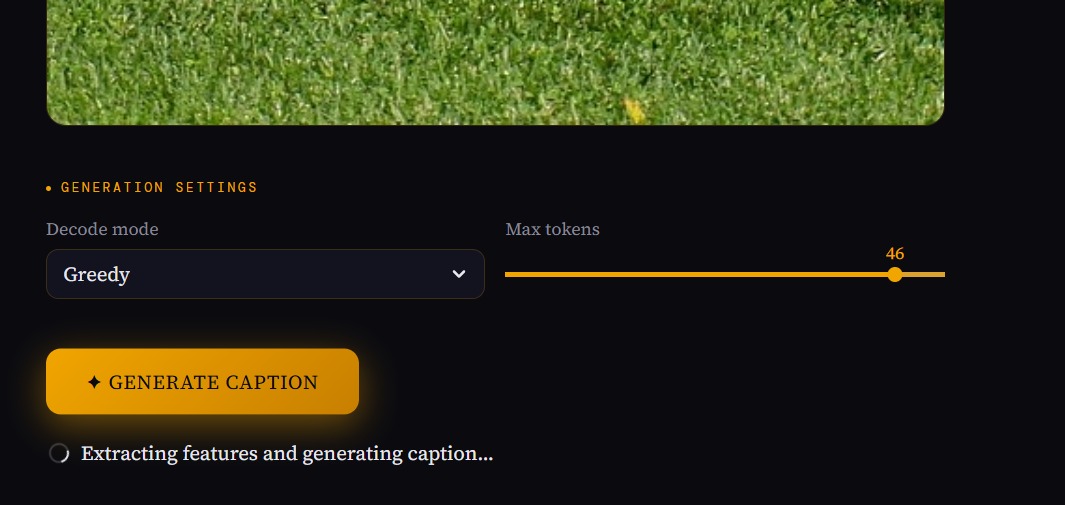


*Figure 3: Caption generation stage in LDCAP showing user-defined decoding configuration and the execution of feature extraction and autoregressive caption prediction.*

*
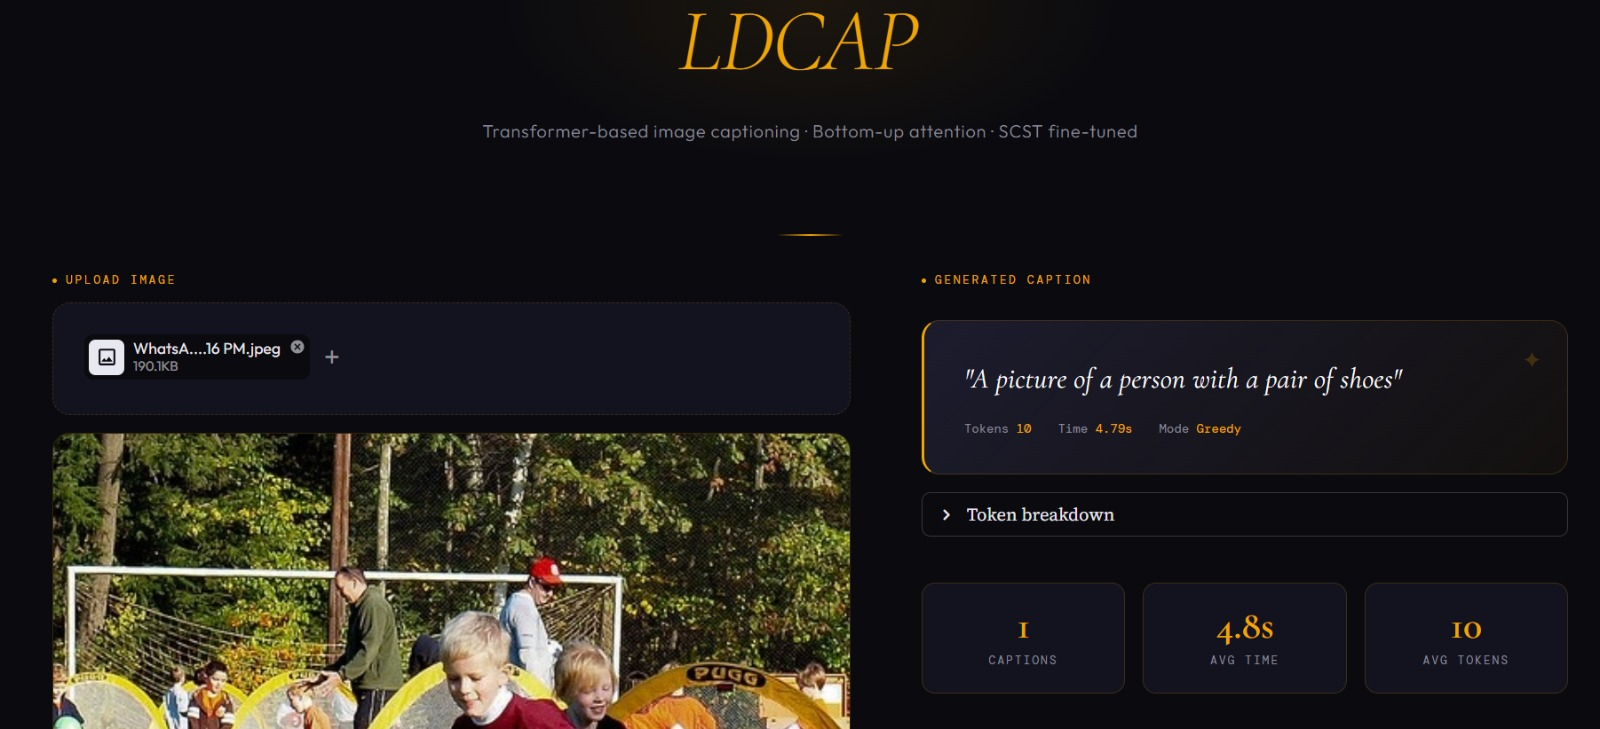
*

*Figure 4: LDCAP output interface displaying the uploaded image and the generated caption, along with decoding details such as token count, inference time, and decoding mode, illustrating the end-to-end caption generation process.*
